## RESEARCH ARTICLE

# Expression of IFN-Gamma is significantly reduced during severity of covid-19 infection in hospitalized patients

Sajid Mansoor<sup>1</sup>, Ayesha Raza Butt<sup>2</sup>, Asima Bibi<sup>2</sup>, Saima Mushtaq<sup>3</sup>, Inayat Ullah<sup>4</sup>, Fahad Alshahrani<sup>5</sup>, Amjad Khan<sup>6\*</sup>, Atika Mansoor<sup>6\*</sup>

**1** Department of Microbiology, Faculty of Science & Technology, University of Central Punjab, Lahore, Pakistan, **2** Department of Pharmacy, Quaid-i-Azam University, Islamabad, Pakistan, **3** Department of Healthcare Biotechnology, Atta-ur-Rahman School of Applied Biosciences (ASAB), National University of Sciences and Technology (NUST), Islamabad, Pakistan, **4** Department of Pediatrics, General Hospital, Islamabad, Pakistan, **5** Security Forces Hospital, Riyadh, Kingdom of Saudi Arabia, **6** Institute of Biomedical & Genetic Engineering (IB&GE), Islamabad, Pakistan

\* [amjadkhan@qau.edu.pk](mailto:amjadkhan@qau.edu.pk) (AK); [atikamansoor@hotmail.com](mailto:atikamansoor@hotmail.com) (AM)

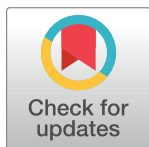

## OPEN ACCESS

**Citation:** Mansoor S, Butt AR, Bibi A, Mushtaq S, Ullah I, Alshahrani F, et al. (2023) Expression of IFN-Gamma is significantly reduced during severity of covid-19 infection in hospitalized patients. PLoS ONE 18(9): e0291332. <https://doi.org/10.1371/journal.pone.0291332>

**Editor:** Md Bashir Uddin, The University of Texas Medical Branch at Galveston, UNITED STATES

**Received:** February 23, 2023

**Accepted:** August 29, 2023

**Published:** September 27, 2023

**Peer Review History:** PLOS recognizes the benefits of transparency in the peer review process; therefore, we enable the publication of all of the content of peer review and author responses alongside final, published articles. The editorial history of this article is available here: <https://doi.org/10.1371/journal.pone.0291332>

**Copyright:** © 2023 Mansoor et al. This is an open access article distributed under the terms of the [Creative Commons Attribution License](https://creativecommons.org/licenses/by/4.0/), which permits unrestricted use, distribution, and reproduction in any medium, provided the original author and source are credited.

**Data Availability Statement:** All relevant data are within the manuscript.

**Funding:** Recipient of award/grant: Atika Mansoor Grant # IBGE/IEC/17/02/21 Funder: Institute of

## Abstract

Cytokines play an important role in SARS-CoV-2 infection progression and severity. A number of inflammatory cytokines have been directly associated with disease severity including IL-6 (interleukin-6), IL-10, TNF- $\alpha$  (tumor necrosis factor alpha), IFN- $\gamma$  (interferon-gamma). Here, in this study, the aim was to better understand the interplay between host immune response mediated by cytokines and severity of SARS-CoV-2 infection by assessing cytokine expression. Therefore, we measured expression levels of a total of 12 genes (IFNA-1, IFN- $\gamma$ , IL-1 $\alpha$ , IL-1 $\beta$ , IL-4, IL-6, IL-7, IL-10, IL-11, IL-13, IL-15, and IL-27) encoding inflammatory, anti-inflammatory and regulatory cytokines using QRT-PCR in hospitalized patients with severe infection compared to mildly infected. IFN- $\gamma$  was identified as a potent marker of disease severity as indicated previously. Moreover, levels of IL-7 were also found to be partially reduced in patients compared to the healthy controls and linked negatively to disease severity. Identification of these cytokines may be helpful in not only understanding disease pathogenesis but also in better management of the patients after covid infection.

## Introduction

The novel beta-coronavirus, severe acute respiratory syndrome coronavirus 2 (SARS-CoV-2), that arose from China back in 2019, is now responsible for over 6.6 million deaths globally according to WHO (<https://covid19.who.int/>) [1]. Coronavirus family contains single stranded RNA viruses with a broad host range including humans [2]. Majority of the cases with SARS-CoV-2 show only mild to moderate symptoms but few, about 20%, progress towards acute bilateral pneumonia, a lethal condition, that may culminate at acute respiratory syndrome and multi-organ failure [3]. In humans the infection presents two imbricated stages starting with highly active virus replication activating human defenses in the form of a strong immune response [4]. The immune response is driven by multiple cytokines having diverse implications, few of these like IL-6 (interleukin-6), IL-10, TNF- $\alpha$  (tumor necrosis factor alpha), IFN- $\gamma$

Biomedical and Genetic Engineering (IBGE) URL: <https://hii-project.weebly.com/> The funders had no role in study design, data collection and analysis, decision to publish, or preparation of the manuscript.

**Competing interests:** The authors have declared that no competing interests exist.

(interferon-gamma) are viewed as independent markers of disease severity [5–8]. Moreover, an accelerated disease progression has been postulated to be directly related to an increase in inflammation, a dysfunctional host immune response culminating in a cytokine storm [9]. This postulate gets more strength by the fact that administration of anti-inflammatory steroids has shown to decrease the mortality rate by 29% in patients, however, the exact role of each of these cytokines is still indistinct to the severe stages of the disease. Furthermore, the significance of a dysfunctional immune response owing to cytokine dysregulation succumbing into a cytokine storm, is still not well understood [10].

Interferons have a vital role of restricting any viral infection and same is for the SARS-CoV-2, however, they are also responsible for disease progression towards a more severe form [11]. Interferon gamma (IFN- $\gamma$ ) is one of the key interferons to cope with viral infections as it narrows the viral replication by stimulating T lymphocytes for cytokine production along with an activation of the cytotoxic T lymphocytes [12]. A number of studies show that both, IFN- $\gamma$  and IFN- $\beta$ , downregulate the SARS-CoV-2 replication and also present synergistic antiviral role against it [13, 14]. Natural killer cells and T lymphocytes secrete the IFN- $\gamma$ , and although it is a molecule driving adaptive immune system along with IL-4 and IL-6, still it has a vital role in all immune response phases [15]. Nevertheless, a persistent elevated level of IFN- $\gamma$  aggravates the systemic inflammation contributing towards tissue injury and organ failure [16]. On the other hand, downregulation of IFN- $\gamma$  is also a contributing factor towards the severity of infection as in the case of SARS-CoV-2.

Among the key interleukins, IL-6 has been identified as a major cytokine combating against the disease progression. In response to a variety of pathogens, especially the viruses, macrophages and T-lymphocytes produce this inflammatory interleukin, with great efficacy [17–19]. The IL-6 is a family of cytokines, comprising IL-6, IL-11, IL-27, IL-30, IL-31, oncostatin M (OSM), leukemia inhibitory factor (LIF), cardiotrophin-1 (CT-1), cardiotrophin like cytokine (CLC), ciliary neurotrophic factor (CNTF) and neuropoietin (NP-1). Apart from IL-31, all other function through binding to a widely present  $\beta$ -receptor, gp130 (glycoprotein 130) [11]. This pleiotropic cytokine (IL-6) has dual effect pro-inflammatory as well as anti-inflammatory [20]. Only the homeostatic IL-6 concentration is effective in settling the tissue lesions and viral infections, on the other hand the excessive IL-6 value progresses towards cytokines storm [17–19]. A direct correlation has been established between the IL-6 and different stages of the disease also along with its radiological changes [6, 21–23]. Additionally, in different disease stages like a need for ventilator, or mortality or in both, the possible prognostic value has also been studied, when taken alone or in combination with other factors [24–28]. It has been reported that a decreased lymphocyte count, especially T-lymphocytes along with an increased level of IL-6 cytokine were associated with sever disease conditions [29, 30]. Where it is also suggested to monitor the IL-6 level throughout the disease progression for a better management of the disease [31].

Interleukin 1 (IL-1) plays a coordinating role in immune and inflammatory responses but also stimulates tissue repair and is one the most major pro-inflammatory cytokine. SARS-CoV-2 induced cytokine storm is due to an elevated level of these interleukins along with IL-6 and others [32]. The serum levels of IL-1 receptor antagonist (IL-1Ra) were significantly higher in patients, as well as among non-survivors when compared to surviving patients [33]. The imbalance between IL-1 and IL-1Ra levels can result in exaggerated inflammatory response and contribute to several human pathologies [34]. In COVID-19, the lung's epithelial injury leads to the secretion of IL-1 $\alpha$  and the production of IL-1 $\beta$ . IL-1 $\alpha$  recruit neutrophils to the infection site while IL-1 $\beta$  is a pro-inflammatory cytokine. Several studies reported high levels of IL-1 $\beta$  and IL-1Ra in the peripheral blood and bronchoalveolar lavage fluid of COVID-19 patients [35–38].

In addition, IL-13, an inflammatory cytokine, plasma titer is also a pronounced risk factor driving the patient status towards need of the mechanical ventilation [39]. This is a fatal stage and may progress towards multi organ failure even more drastic in the form of patient death [40, 41]. IL-13 is an immune regulatory cytokine which is essentially produced by activated helper T-lymphocytes (Th2) [42, 43]. Apart from Th2 cells a broad range of other immune cells also secrete IL-13 including eosinophils, mast cells, basophils, natural killer cells, smooth muscle cells and fibroblast cells [44, 45]. It is reported that there is a functional association between IL-13 and IL-4 cytokines both also share almost 25% sequence homology and their genes are located on chromosome 5q31 [45]. A number of studies have proven elevated IL-13 serum level in COVID patients where an increased level of IL-13 in patients was associated with a requirement of mechanical ventilation support, more importantly patients receiving the IL-13 repression drugs showed much less severity of the disease [46].

In lieu of some clinical studies this has been extracted that the patients with more critical disease condition show lower counts of CD4<sup>+</sup> and CD8<sup>+</sup> cells while elevated levels of serum IL-10 and IL-6 in comparison to the patients with low or mild disease [47–49]. More importantly this lethal amalgam increases the mortality rate, advocating a pronounced role of IL-10 and IL-6 in viral pathogenesis [9]. Cytokines like IL-1, IL-6 and Tumor Necrosis Factor- $\alpha$  which are grouped in pro-inflammatory cytokines are more active in the first response to the disease while anti-inflammatory cytokine like IL-10 are more predominant in later stages when infection is sustained to count on the inflammation and to keep immune homeostasis [50]. IL-10 being a central molecule of the cytokine system downregulates the production of pro-inflammatory cytokines in the later stages of disease which aims at minimizing the damage induced by inflammatory cytokines [50, 51]. Furthermore, a meta-analysis research including 6242 patients also found increased levels of IL-10 and IL-6 in critical COVID patients [52]. Present study, therefore, was planned to explore further SARS-CoV-2 persuaded cytokines to better understand immune response mechanisms and more importantly if any potential therapeutic design against SARS-CoV-2 is possible involving cytokines.

## Methods

A total of 136 suspected SARS-CoV-2 infected patients, samples collected from Islamabad general teaching hospital, were included in the study. Out of these 68 were hospitalized, with SARS-CoV-2 confirmed either by covid PCR or HRCT while the other 68 were mild patients confirmed by covid PCR or by symptoms associated with covid. One hundred normal controls confirmed covid PCR negative samples were also collected for the study. Subjects were divided into following groups: 1. Severely Ill: Critically ill hospitalized patients, 2. Mildly Ill: Outdoor patients, who came to hospital with COVID-19 symptoms and later confirmed for COVID-19, 3. Control: Normal individuals with no underlying illnesses.

## Expression analysis

The role of various genes involved in innate and humoral immune response was investigated. Expression of a total of 12 genes (IFNA-1, IFN $\gamma$ , IL-1 $\alpha$ , IL-1 $\beta$ , IL-4, IL-6, IL-7, IL-10, IL-11, IL-13, IL-15, and IL-27) encoding inflammatory, anti-inflammatory and regulatory cytokines were analyzed using QRT-PCR. All primers sequences were obtained from GeneCard (<https://www.genecards.org/>). For the QRT-PCR, 5ml blood was collected from each patient and control and processed within one to two hours for RNA isolation. The blood samples were treated with lysis buffer and washed to remove RBCs from the peripheral blood lymphocytes. The PBLs pellet was used for RNA isolation by TRIzol-LS (Thermo Fisher Scientific Inc., Cat No: 10296–028) and cDNA was synthesized using RevertAidTranscriptase (ThermoScientificCat

No: EP0442) according to the manufacturer's instructions. GAPDH was used as house-keeping gene. Expression of selected target genes was measured by quantifying mRNA through QRT-PCR on SLAN-96P (Sansure Biotech). Each 20 $\mu$ l reaction mixture contained 10 $\mu$ l of 2X SYBRGreen/ROX qPCR Mix (Thermo FisherScientificCat No: K0221), 1 $\mu$ M of each forward and reverse primers, and 2 $\mu$ l of 1:10 cDNA. The PCR consisted of one cycle at 50°C for 2 min, one cycle at 95°C for 10 min and 45 cycles each of 95°C for 15 sec and 60°C for 1min with data acquisition at 60. Melting and dissociation curve was generated for each of the primer set to monitor amplification specificity. GAPDH gene was quantified as internal reference to calculate relative expression level of target gene. Relativistic expression (rE) of target gene was determined as:  $rE = 100 \times 2^{-\Delta Ct}$ , where  $\Delta Ct$  = mean Ct (target gene) minus mean Ct (GAPDH).

### Statistical analysis

Statistical analysis was performed to assess the significance between variables using Microsoft Excel and SPSS tools and the relevant graphs were made on Prism by GraphPad. Values of  $p$  below 0.1 were considered significant.

### Ethics statement

This study was conducted after getting ethical approval from the ethical review board of Institute of Biomedical and Genetic Engineering (Vide letter number: IBGE/IEC/17/02/21). Patients and controls were briefed about the study and informed written consent was obtained from all mild patients and controls. The severe patients mostly gave verbal consent as due to the covid imposed restrictions, the consent forms were not allowed inside the intensive care units and also many of them were not in a condition to sign the consent form. Detailed information for each patient was collected from hospital clinical notes. All procedures performed in studies involving human participants were in accordance with the ethical standards of the institutional and/or national research committee and with the 1964 Helsinki declaration and its later amendments or comparable ethical standards.

### Results and discussion

Considering SARS CoV-2 global health concern as a pandemic, we decided to explore and describe the human immune system behavior, in terms of specific cytokine blood levels through their expression. Our study focused on the levels of IFNA-1, IFN $\gamma$ , IL-1 $\alpha$ , IL-1 $\beta$ , IL-4, IL-6, IL-7, IL-10, IL-11, IL-13, IL-15 and IL-27 at a given time in different groups of patients and healthy individuals that is expressed in detail in the underlines.

A total of 136 covid patients and 94 controls were included in the study which were initially divided into two groups based on the severity of the disease (Table 1). These patients were then further divided into four age groups where most of the patients fell into 45–64 years age group with the mean age of 50 years. However, when these patients were separated on the basis of disease severity (mild and severe), the mean age value for severe patients was 58.9 years (32 years-100 years). The mean age value for mild patients was 39.3 years (16 years -80 years). Among the patients 74% were males and 26% were females. The most common comorbidities were hypertension and diabetes. Others included cardiac disease, kidney disease, asthma, epilepsy and some psychological disorders.

Presence of comorbidity was strongly associated with disease severity especially diabetes and hypertension (Fig 1). The blood samples collected from these patients and controls were used to evaluate expression levels of 12 cytokines (Figs 2 and 3). The cytokines were selected on the basis of their role in response to the type of infection and the specific role played by the cytokine whether pro- or anti-inflammatory or regulatory.

**Table 1. Socio-demographic characteristics of study participants (n = 230).**

|                   |                  | Severe Patients | Mild Patients | Controls   | Total       |
|-------------------|------------------|-----------------|---------------|------------|-------------|
|                   |                  | n = 68 (%)      | n = 68 (%)    | n = 94 (%) | n = 230 (%) |
| Age               | <25              | 0 (0.0)         | 7 (10.3)      | 15 (16.0)  | 22 (9.6)    |
|                   | 25–44            | 13 (19.1)       | 34 (50)       | 53 (56.4)  | 100 (43.5)  |
|                   | 45–64            | 34 (50)         | 22 (32.4)     | 25 (26.6)  | 81 (35.2)   |
|                   | 65<              | 21 (30.9)       | 5 (7.3)       | 1 (1.0)    | 27 (11.7)   |
| Gender            | Male             | 42 (61.8)       | 59 (86.8)     | 77 (81.9)  | 178 (77.4)  |
|                   | Female           | 26 (38.2)       | 9 (13.2)      | 17 (18.1)  | 52 (22.6)   |
| Comorbidity       | CD-HT+           | 3 (4.4)         | 3 (4.4)       | 1 (1.1)    | 7 (3.0)     |
|                   | CD-HT-           | 2 (2.9)         | 2 (2.9)       | 1 (1.1)    | 5 (2.2)     |
|                   | Diabetes-HT+     | 11 (16.2)       | 2 (2.9)       | 0 (0.0)    | 13 (5.7)    |
|                   | Diabetes-HT-     | 9 (13.2)        | 3 (4.4)       | 3 (3.2)    | 15 (6.5)    |
|                   | HT+-OM           | 10 (14.7)       | 3 (4.4)       | 8 (8.5)    | 21 (9.1)    |
|                   | OM               | 14 (20.6)       | 8 (11.8)      | 0 (0.0)    | 22 (9.6)    |
|                   | Nil              | 19 (27.9)       | 47 (69.1)     | 81 (86.2)  | 147 (63.9)  |
| HTassociation     | HT+-anymorbidity | 24 (35.3)       | 8 (11.8)      | 9 (9.6)    | 41 (17.8)   |
|                   | HT—anymorbidity  | 25 (36.8)       | 13 (19.1)     | 4 (4.3)    | 42 (18.3)   |
|                   | Nil              | 19 (27.9)       | 47 (69.1)     | 81 (86.2)  | 147 (63.9)  |
| Diabetassociation | Dia+anymorbidity | 20 (29.4)       | 5 (7.4)       | 3 (3.2)    | 28 (12.2)   |
|                   | Dia-antmorbidity | 29 (42.6)       | 16 (23.5)     | 10 (10.6)  | 55 (23.9)   |
|                   | Nil              | 19 (27.9)       | 47 (69.1)     | 81 (86.2)  | 147 (63.9)  |

<https://doi.org/10.1371/journal.pone.0291332.t001>

Levels of IFN- $\gamma$ , IFN- $\alpha$ , IL-6, and IL-7 were found to be significantly related with SARS CoV-2 infection (Figs 2 and 3). Interferons are one of the most diverse cytokines with Type I and II actively involved against viral infections. The type I interferons alpha and beta are expressed by a variety of cell types [53] and act as first line of defense against most cellular infections, whereas type II has only one type of the gamma interferon which is important against viral, bacterial and fungal infections [54, 55].

This cohort study mainly comprised of three groups: normal individuals, patients with mild COVID disease and patients with severe COVID illness. Four of the lot of cytokines checked, interferon gamma (IFN- $\gamma$ ), interferon alpha (IFN- $\alpha$ ), interleukin-6 (IL-6) and interleukin-7 (IL-7), were found to be significantly related to disease severity.

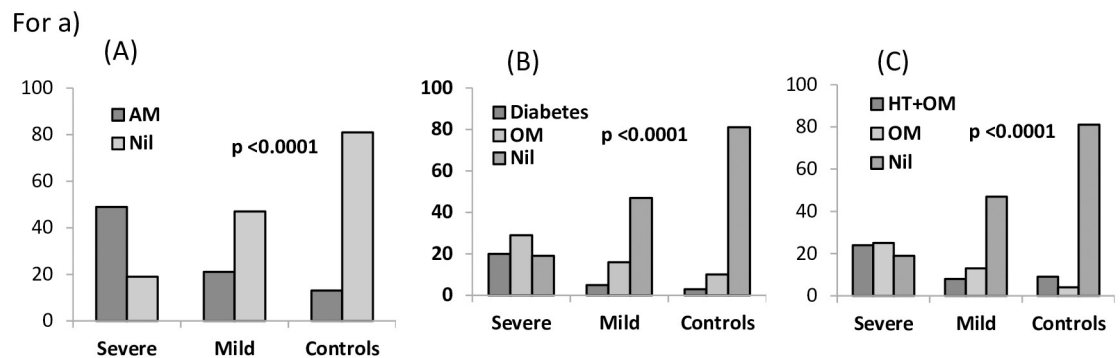

**Fig 1. Effect of co-morbidities on disease status.** (A) Any morbidity compared with no morbidity. (B)& (C) Diabetes and Hypertension association with disease severity. (Chi Sq Test). OM: Other morbidities.

<https://doi.org/10.1371/journal.pone.0291332.g001>

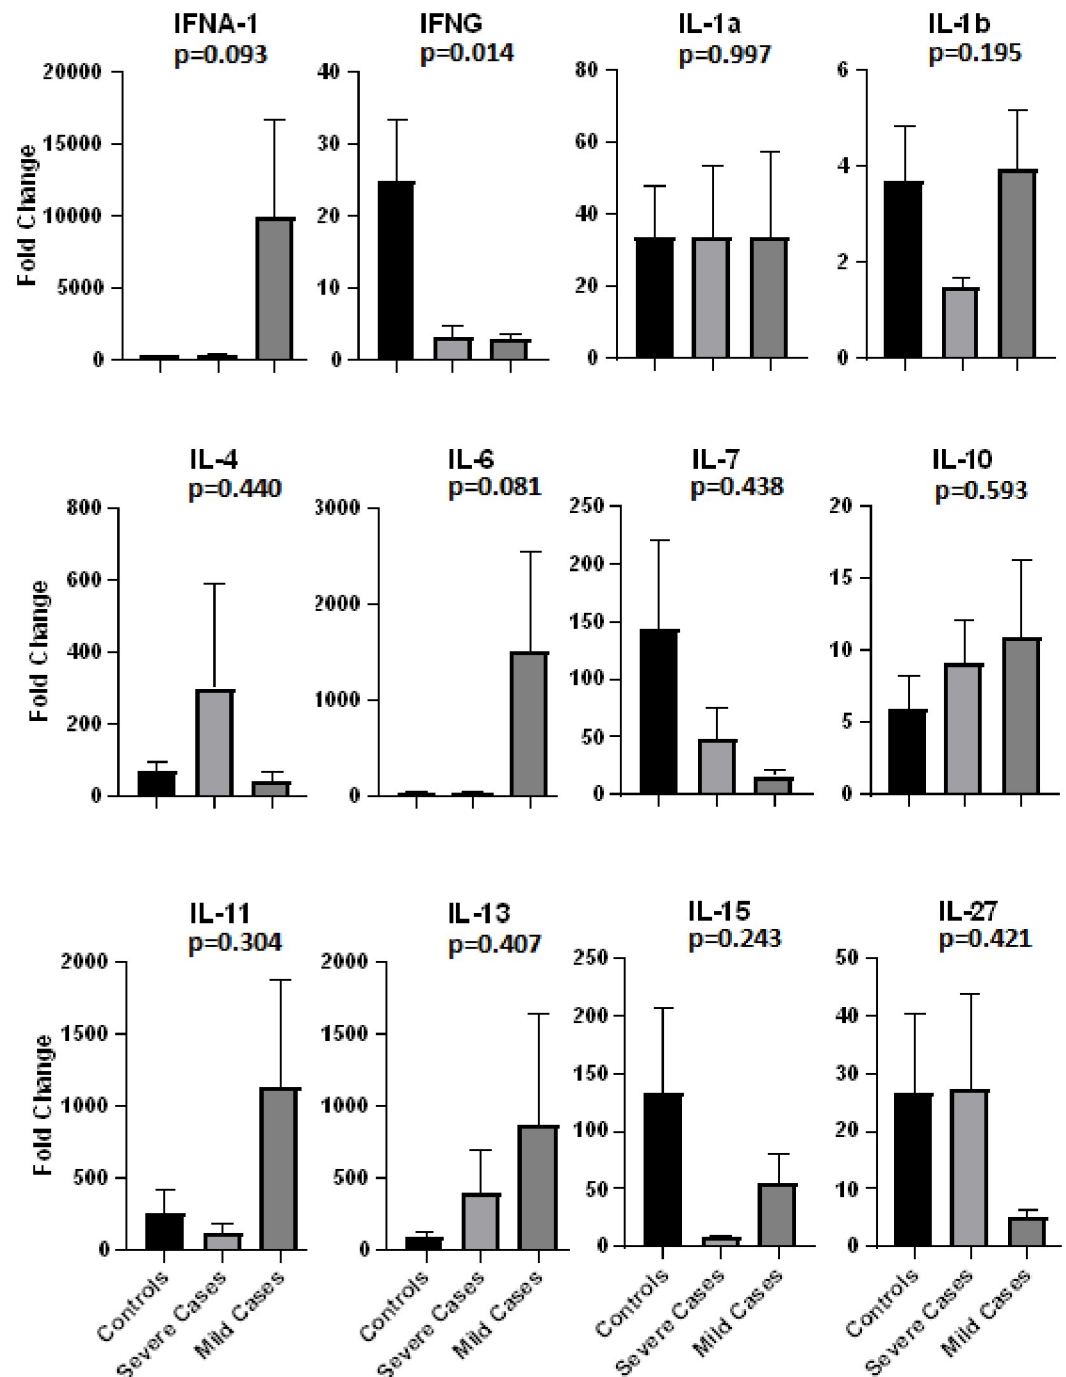

**Fig 2.** Expression of various cytokines in covid severe and mild patients compared to controls. (One way ANOVA).

<https://doi.org/10.1371/journal.pone.0291332.g002>

Researchers around the globe have come up with much diverse cytokine and interferon results in COVID patients and the major factors driving this include difference in geographical location, demographic location, healthcare system, diseases stages, clinical settings and available resources [31]. In both mild and severely ill patient groups, the IFN- $\gamma$  was found in significantly lower levels as compared to the normal individual group. Repeated sampling should be



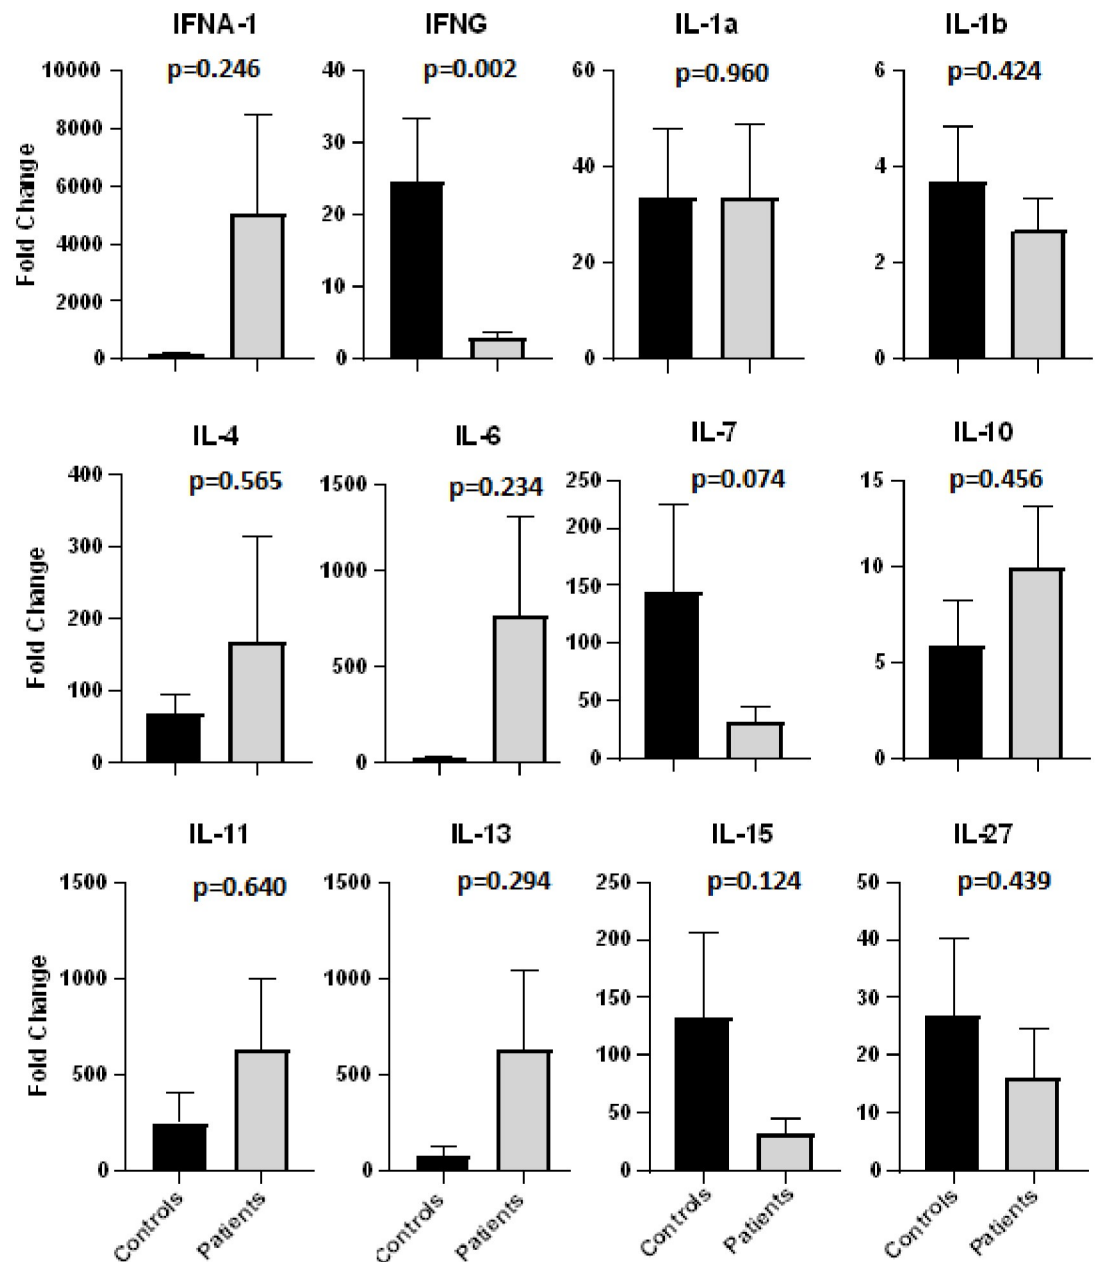

Fig 3. Expression of various cytokines in covid patients compared to controls. (T-Test).

<https://doi.org/10.1371/journal.pone.0291332.g003>

done in order to build a complete panorama of cytokines and interferons levels, which unfortunately is difficult in current scenario, however even the results obtained with a single sample are also significant and relatable to other studies. According to *Sainz et al* (2004), previous studies focused on measuring the concentrations of IFN- $\beta$  and - $\gamma$  towards their viral replication inhibitory role, but his research proved that even a low concentration of IFN- $\gamma$  and IFN- $\beta$  (100U/ml) are quite effective in minimizing the SARS-CoV-2 virus replication to  $1 \times 10^5$  - folds [14], which is quite in accordance to our results. These findings suggest that the IFNs based therapy should also be taken into consideration as a potential SARS-CoV-2 treatment.

Discussing about IL-6, we found relatively higher values in the mildly ill patients as compared to the normal as well as severely ill patients, however *Curz et al* reported the increasing value of IL-6 towards progression of disease to more severe stage [31]. Recently, a number of clinical studies have shown the contribution of IL-6 increasing systemic value towards severity of a number of viral infections including Andes virus [56], influenza virus [57], HBV [58], hepatitis C virus [59], human immunodeficiency virus [60], Crimean-Congo hemorrhagic fever virus [61] and Chikungunya virus [62]. Perhaps, certain viruses use this upregulation of IL-6 as a tool to escape the immune system, however the exact mechanism of IL-6 to viral infection response is still to be elucidated [17].

IL-7 level analysis of all the different patients in both mild and severe stages of the disease showed slightly higher levels in severely ill patients, which is in accordance with *Huang et al*, who reported elevated levels of IL-7 in ICU patients as compared to non-ICU patients [49]. In another study, however, the increased IL-7 levels corresponded to absolute number of T-cells independent of the severity of diseases [63]. Another research reported an increased level in IL-7 for both symptomatic and asymptomatic SARS-CoV-2 patients when compared to the healthy individuals, moreover male patients showed higher values of IL-7 as compared to female patients [64]. Furthermore, in different clinical trials the patients receiving IL-7 based treatment turned up with elevated lymphocyte count without any prove of hyper-inflammation and lung damage [65]. Still another study reported recovery of lymphopenic patient to increased lymphocyte cell count and normal interferons levels with also improvement in diseases status from sever to mild one [66]. These findings do tentatively suggest importance of IL-7 as a disease severity biomarker and also as a potential therapeutic.

Host immune system has a crucial role during SARS-CoV-2 pathogenesis. Interplay between different cytokines determine the outcome and severity of the infection. Understanding these may result in a better understanding of not only how these cytokines contribute towards pathogenesis but also if they can indicate disease progression or be used therapeutically. In this study we identify IFN- $\gamma$  as a potent marker of disease severity as indicated previously. Moreover, levels of IL-7 were found to be reduced in patients compared to the healthy controls and linked negatively to disease severity. Finally, the study tries to provide a picture of levels of different cytokines in patients with severe to mild infection and may enhance our understanding about involvement of cytokines in SARS-CoV-2 pathogenesis.

## Conclusions

The most important goal of this study was to understand the role of cytokines in COVID-19 patients. Patients with SARS-CoV-2 infection had high levels of various cytokines, specifically IFN- $\gamma$  was identified as a potent marker of disease severity that can be identified as an indicator of disease progression and a therapeutic goal.

## Limitations

we suggest that the exact timing for application of IFN $\gamma$ -based therapeutics could be crucial: it should be earlier to significantly reduce the viral load and thus decrease the overall severity of the disease. In the field of drug and treatment, more activities should be done to find a solution to control and replicate the COVID-19 virus and ultimately reduce its side effects in clinics.

## Acknowledgments

We are grateful to the patients who participated in this study.



## Author Contributions

**Conceptualization:** Sajid Mansoor, Ayesha Raza Butt, Asima Bibi, Saima Mushtaq, Inayat Ullah, Amjad Khan, Atika Mansoor.

**Data curation:** Ayesha Raza Butt, Asima Bibi.

**Formal analysis:** Sajid Mansoor, Atika Mansoor.

**Investigation:** Ayesha Raza Butt, Asima Bibi, Inayat Ullah.

**Methodology:** Ayesha Raza Butt, Asima Bibi.

**Project administration:** Atika Mansoor.

**Resources:** Atika Mansoor.

**Supervision:** Amjad Khan, Atika Mansoor.

**Writing – original draft:** Sajid Mansoor.

**Writing – review & editing:** Saima Mushtaq, Fahad Alshahrani, Amjad Khan, Atika Mansoor.

## References

1. Zhu N, Zhang D, Wang W, Li X, Yang B, Song J, et al. A Novel Coronavirus from Patients with Pneumonia in China, 2019. *New England Journal of Medicine*. 2020; 382(8):727–33. <https://doi.org/10.1056/NEJMoa2001017> PMID: 31978945
2. Channappanavar R, Perlman S. Pathogenic human coronavirus infections: causes and consequences of cytokine storm and immunopathology. *Semin Immunopathol*. 2017; 39(5):529–39. <https://doi.org/10.1007/s00281-017-0629-x> PMID: 28466096
3. Wiersinga WJ, Rhodes A, Cheng AC, Peacock SJ, Prescott HC. Pathophysiology, Transmission, Diagnosis, and Treatment of Coronavirus Disease 2019 (COVID-19): A Review. *JAMA—Journal of the American Medical Association*. 2020; 324(8):782–93. <https://doi.org/10.1001/jama.2020.12839> PMID: 32648899
4. To KKW, Tsang OTY, Leung WS, Tam AR, Wu TC, Lung DC, et al. Temporal profiles of viral load in posterior oropharyngeal saliva samples and serum antibody responses during infection by SARS-CoV-2: an observational cohort study. *Lancet Infect Dis*. 2020; 20(5):565–74. [https://doi.org/10.1016/S1473-3099\(20\)30196-1](https://doi.org/10.1016/S1473-3099(20)30196-1) PMID: 32213337
5. Ye Q, Wang B, Mao J. The pathogenesis and treatment of the ‘Cytokine Storm’ in COVID-19.’ *Journal of Infection*. 2020; 80(6):607–13. <https://doi.org/10.1016/j.jinf.2020.03.037> PMID: 32283152
6. Iannaccone G, Scacciavillani R, Del Buono MG, Camilli M, Ronco C, Lavie CJ, et al. Weathering the Cytokine Storm in COVID-19: Therapeutic Implications. *Cardiorenal Med*. 2020; 10(5):277–87. <https://doi.org/10.1159/000509483> PMID: 32599589
7. Manjili RH, Zarei M, Habibi M, Manjili MH. COVID-19 as an Acute Inflammatory Disease. *The Journal of Immunology*. 2020; 205(1):12–9. <https://doi.org/10.4049/jimmunol.2000413> PMID: 32423917
8. Del Valle DM, Kim-Schulze S, Huang HH, Beckmann ND, Nirenberg S, Wang B, et al. An inflammatory cytokine signature predicts COVID-19 severity and survival. *Nat Med*. 2020; 26(10):1636–43. <https://doi.org/10.1038/s41591-020-1051-9> PMID: 32839624
9. Mehta P, McAuley DF, Brown M, Sanchez E, Tattersall RS, Manson JJ. COVID-19: consider cytokine storm syndromes and immunosuppression. *The Lancet*. 2020; 395(10229):1033–4. [https://doi.org/10.1016/S0140-6736\(20\)30628-0](https://doi.org/10.1016/S0140-6736(20)30628-0) PMID: 32192578
10. Dexamethasone in Hospitalized Patients with Covid-19. *New England Journal of Medicine*. 2021; 384(8):693–704. <https://doi.org/10.1056/NEJMoa2021436> PMID: 32678530
11. Garbers C, Scheller J. Interleukin-6 and interleukin-11: Same same but different. *Biol Chem*. 2013; 394(9):1145–61. <https://doi.org/10.1515/hsz-2013-0166> PMID: 23740659
12. Levy DE, García-Sastre A. The virus battles: IFN induction of the antiviral state and mechanisms of viral evasion. *Cytokine Growth Factor Rev*. 2001; 12(2–3):143–56. [https://doi.org/10.1016/s1359-6101\(00\)00027-7](https://doi.org/10.1016/s1359-6101(00)00027-7) PMID: 11325598
13. Cinatl J, Morgenstern B, Bauer G, Chandra P, Rabenau H, Doerr HW. Since January 2020 Elsevier has created a COVID-19 resource centre with free information in English and Mandarin on the novel

- coronavirus COVID-19. The COVID-19 resource centre is hosted on Elsevier Connect, the company's public news and information. 2020;(January).
14. Sainz B, Mossel EC, Peters CJ, Garry RF. Interferon-beta and interferon-gamma synergistically inhibit the replication of severe acute respiratory syndrome-associated coronavirus (SARS-CoV). *Virology*. 2004; 329(1):11–7. <https://doi.org/10.1016/j.virol.2004.08.011> PMID: 15476870
  15. Robinson CM, O'Dee D, Hamilton T, Nau GJ. Cytokines involved in interferon- $\gamma$  production by human macrophages. *J Innate Immun*. 2009; 2(1):56–65.
  16. Parker R, Lett N. Copyright of Nutrition Today is the property of Lippincott Williams & Wilkins and its content may not be copied or emailed to multiple sites or posted to a listserv without the copyright holder's express written permission. However, users may print., 2014;
  17. Velazquez-Salinas L, Verdugo-Rodriguez A, Rodriguez LL, Borca M V. The role of interleukin 6 during viral infections. *Front Microbiol*. 2019; 10(MAY):6–11. <https://doi.org/10.3389/fmicb.2019.01057> PMID: 31134045
  18. Dienz O, Rud JG, Eaton SM, Lanthier PA, Burg E, Drew A, et al. Essential role of IL-6 in protection against H1N1 influenza virus by promoting neutrophil survival in the lung. *Mucosal Immunol*. 2012; 5(3):258–66. <https://doi.org/10.1038/mi.2012.2> PMID: 22294047
  19. Tanaka T, Narazaki M, Kishimoto T. Immunotherapeutic implications of IL-6 blockade for cytokine storm. *Immunotherapy*. 2016; 8(8):959–70. <https://doi.org/10.2217/imt-2016-0020> PMID: 27381687
  20. Tanaka T, Narazaki M, Kishimoto T. patterns (DAMPs), which are released from damaged or dying cells in noninfectious inflammations such as burn or trauma, directly or indirectly promote inflammation. During sterile surgical operations, an increase in serum IL66 levels precedes elevation of. 2014;6(Kishimoto 1989):1–16.
  21. Liu T, Zhang J, Yang Y, Ma H, Li Z, Zhang J, et al. The role of interleukin-6 in monitoring severe case of coronavirus disease 2019. *EMBO Mol Med*. 2020; 12(7):1–12. <https://doi.org/10.15252/emmm.202012421> PMID: 32428990
  22. Liu Z, Li J, Chen D, Gao R, Zeng W, Chen S, et al. Dynamic Interleukin-6 Level Changes as a Prognostic Indicator in Patients With COVID-19. *Front Pharmacol*. 2020; 11(July):1–11. <https://doi.org/10.3389/fphar.2020.01093> PMID: 32765283
  23. Qin C, Zhou L, Hu Z, Zhang S, Yang S, Tao Y, et al. Dysregulation of Immune Response in Patients with COVID-19 in Wuhan, China. *SSRN Electronic Journal*. 2020.
  24. Laguna-Goya R, Utrero-Rico A, Talayero P, Lasa-Lazaro M, Ramirez-Fernandez A, Naranjo L, et al. IL-6-based mortality risk model for hospitalized patients with COVID-19. Vol. 146, *Journal of Allergy and Clinical Immunology*. American Academy of Allergy, Asthma & Immunology; 2020. 799–807.e9 p.
  25. Herold T, Jurinovic V, Arnreich C, Lipworth BJ, Hellmuth JC, von Bergwelt-Baildon M, et al. Elevated levels of IL-6 and CRP predict the need for mechanical ventilation in COVID-19. *Journal of Allergy and Clinical Immunology*. 2020; 146(1):128–136.e4. <https://doi.org/10.1016/j.jaci.2020.05.008> PMID: 32425269
  26. Aziz M, Fatima R, Assaly R. Elevated interleukin-6 and severe COVID-19: A meta-analysis. *J Med Virol*. 2020; 92(11):2283–5. <https://doi.org/10.1002/jmv.25948> PMID: 32343429
  27. Grifoni E, Valoriani A, Cei F, Lamanna R, Gelli AMG, Ciambotti B, et al. Interleukin-6 as prognosticator in patients with COVID-19. *Journal of Infection*. 2020; 81(3):452–82. <https://doi.org/10.1016/j.jinf.2020.06.008> PMID: 32526326
  28. Vultaggio A, Vivarelli E, Virgili G, Lucenteforte E, Bartoloni A, Nozzoli C, et al. Prompt Predicting of Early Clinical Deterioration of Moderate-to-Severe COVID-19 Patients: Usefulness of a Combined Score Using IL-6 in a Preliminary Study. *Journal of Allergy and Clinical Immunology: In Practice*. 2020; 8(8):2575–2581.e2. <https://doi.org/10.1016/j.jaip.2020.06.013> PMID: 32565226
  29. Chen X, Zhao B, Qu Y, Chen Y, Xiong J, Feng Y, et al. Detectable serum SARS-CoV-2 viral load (RNAemia) is closely correlated with drastically elevated interleukin 6 (IL-6) level in critically ill COVID-19 patients. *Clin Infect Dis*. 2020; 6.
  30. Chiappelli F, Khakshooy A, Greenberg G. CoViD-19 Immunopathology & Immunotherapy Declaration on official E-mail. *Medical Bioinformatics*. 2020; 16(3):219–22.
  31. Santa Cruz A, Mendes-Frias A, Oliveira AI, Dias L, Matos AR, Carvalho A, et al. Interleukin-6 Is a Biomarker for the Development of Fatal Severe Acute Respiratory Syndrome Coronavirus 2 Pneumonia. *Front Immunol*. 2021; 12(February):1–10. <https://doi.org/10.3389/fimmu.2021.613422> PMID: 33679753
  32. Fajgenbaum DC, June CH. Cytokine storm. *New England Journal of Medicine*. 2020; 383(23):2255–73. <https://doi.org/10.1056/NEJMra2026131> PMID: 33264547
  33. Kergel B, Kergel F, Aksakal A, Aşkın S, Sağlam L, Akgün M. Evaluation of alpha defensin, IL-1 receptor antagonist, and IL-18 levels in COVID-19 patients with macrophage activation syndrome and acute

- respiratory distress syndrome. *J Med Virol.* 2021; 93(4):2090–8. <https://doi.org/10.1002/jmv.26589> PMID: 33038012
34. Palomo J, Dietrich D, Martin P, Palmer G, Gabay C. The interleukin (IL)-1 cytokine family—Balance between agonists and antagonists in inflammatory diseases. *Cytokine.* 2015; 76(1):25–37. <https://doi.org/10.1016/j.cyto.2015.06.017> PMID: 26185894
  35. Makaremi S, Asgarzadeh A, Kianfar H, Mohammadnia A, Asghariazar V, Safarzadeh E. The role of IL-1 family of cytokines and receptors in pathogenesis of COVID-19. *Inflammation Research.* 2022; 71(7):923–47. <https://doi.org/10.1007/s00011-022-01596-w> PMID: 35751653
  36. Jamilloux Y, Henry T, Belot A, Viel S, Fauter M, elJammal T, et al. Should we stimulate or suppress immune responses in COVID-19? Cytokine and anti-cytokine interventions. *Autoimmun Rev.* 2020; 19(7):102567. <https://doi.org/10.1016/j.autrev.2020.102567> PMID: 32376392
  37. Martinon F, Burns K, Tschopp J. The inflammasome: a molecular platform triggering activation of inflammatory caspases and processing of proIL- $\beta$ . *Mol Cell.* 2002; 10(2):417–26.
  38. Liao M, Liu Y, Yuan J, Wen Y, Xu G, Zhao J, et al. Single-cell landscape of bronchoalveolar immune cells in patients with COVID-19. *Nat Med.* 2020; 26(6):842–4. <https://doi.org/10.1038/s41591-020-0901-9> PMID: 32398875
  39. Donlan AN, Sutherland TE, Marie C, Preissner S, Bradley BT, Carpenter RM, et al. IL-13 is a driver of COVID-19 severity. *JCI Insight.* 2021; 6(15).
  40. Mangalmurti N, Hunter CA. Cytokine Storms: Understanding COVID-19. *Immunity.* 2020; 53(1):19–25. <https://doi.org/10.1016/j.immuni.2020.06.017> PMID: 32610079
  41. Tisoncik JR, Korth MJ, Simmons CP, Farrar J, Martin TR, Katze MG. Into the Eye of the Cytokine Storm. *Microbiology and Molecular Biology Reviews.* 2012; 76(1):16–32. <https://doi.org/10.1128/MMBR.05015-11> PMID: 22390970
  42. McKenzie ANJ, Cullen JA, De Waal Malefyt R, Briere F, Punnonen J, Aversa G, et al. Interleukin 13, a T-cell-derived cytokine that regulates human monocyte and B-cell function. *Proc Natl Acad Sci U S A.* 1993; 90(8):3735–9. <https://doi.org/10.1073/pnas.90.8.3735> PMID: 8097324
  43. Minty A, Chalon P, Derocq JM, Dumont X, Guillemot JC, Kaghad M, et al. Interleukin-13 is a new human lymphokine regulating inflammatory and immune responses. *Nature.* 1993; 362(6417):248–50. <https://doi.org/10.1038/362248a0> PMID: 8096327
  44. Wynn TA. IL-13 effector functions. *Annu Rev Immunol.* 2003; 21:425–56. <https://doi.org/10.1146/annurev.immunol.21.120601.141142> PMID: 12615888
  45. Mannon P, Reinisch W. Interleukin 13 and its role in gut defence and inflammation. *Gut.* 2012; 61(12):1765–73. <https://doi.org/10.1136/gutjnl-2012-303461> PMID: 22942239
  46. Donlan AAN, Sutherland TE, Marie C, Preissner S, Bradley T, Carpenter RM, et al. Title: IL-13 is a driver of COVID-19 severity Department Oral and Maxillofacial Surgery, Charité—Universitätsmedizin Berlin, FreieUniversität Berlin, Science—IT and Institute of Physiology, Charité—Universitätsmedizin Berlin, corporate mem. 2021.
  47. Xu Z, Shi L, Wang Y, Zhang J, Huang L, Zhang C, et al. Pathological findings of COVID-19 associated with acute respiratory distress syndrome [published correction appears in *Lancet Respir Med.* 2020 Feb 25;:]. *Lancet Respir Med.* 2020; 8(4):420–422. [https://doi.org/10.1016/S2213-2600\(20\)30076-X](https://doi.org/10.1016/S2213-2600(20)30076-X) *Lancet Respir Med.* 2020;8(feb 25):420–2. PMID: 32085846
  48. Jie Guan W, Yi Ni Z, Hu Y, Hua Liang W, Quan Ou C, Xing He J, et al. Clinical Characteristics of Coronavirus Disease 2019 in China. *New England Journal of Medicine.* 2020; 382(18):1708–20. <https://doi.org/10.1056/NEJMoa2002032> PMID: 32109013
  49. Huang C, Wang Y, Li X, Ren L, Zhao J, Hu Y, et al. Clinical features of patients infected with 2019 novel coronavirus in Wuhan, China. *The Lancet.* 2020; 395(10223):497–506.
  50. Rojas JM, Avia M, Martín V, Sevilla N. IL-10: A multifunctional cytokine in viral infections. *J Immunol Res.* 2017;2017. <https://doi.org/10.1155/2017/6104054> PMID: 28316998
  51. Ouyang W, Rutz S, Crellin NK, Valdez PA, Hymowitz SG. Regulation and functions of the IL-10 family of cytokines in inflammation and disease. *Annu Rev Immunol.* 2011; 29:71–109. <https://doi.org/10.1146/annurev-immunol-031210-101312> PMID: 21166540
  52. Udomsinprasert W, Jittikoon J, Sangroongruangsri S, Chaikledkaew U. Circulating Levels of Interleukin-6 and Interleukin-10, But Not Tumor Necrosis Factor-Alpha, as Potential Biomarkers of Severity and Mortality for COVID-19: Systematic Review with Meta-analysis. *J Clin Immunol.* 2021; 41(1):11–22. <https://doi.org/10.1007/s10875-020-00899-z> PMID: 33128665
  53. McNab F, Mayer-barber K, Sher A, Wack A, Garra AO. Europe PMC Funders Group Type I interferons in infectious disease. 2020; 15(2):87–103.
  54. Fenimore J, Young HA. Regulation of IFN- $\gamma$  expression. *Adv Exp Med Biol.* 2016; 941:1–19.

55. Glasgow LA. Leukocytes and interferon in the host response to viral infections. II. Enhanced interferon response of leukocytes from immune animals. *J Bacteriol.* 1966; 91(6):2185–91. <https://doi.org/10.1128/jb.91.6.2185-2191.1966> PMID: 5943935
56. Angulo J, Martínez-Valdebenito C, Marco C, Galeno H, Villagra E, Vera L, et al. Serum levels of interleukin-6 are linked to the severity of the disease caused by Andes Virus. *PLoS Negl Trop Dis.* 2017; 11(7):1–13.
57. Zheng J, Shi Y, Xiong L, Zhang W, Li Y, Gibson PG, et al. The Expression of IL-6, TNF- $\mu$  and MCP-1 in Respiratory Viral Infection in Acute Exacerbations of Chronic Obstructive Pulmonary Disease. *J Immunol Res.* 2017;2017.
58. Torre D, Zeroli C, Giola M, Ferrario G, Fiori GP, Bonetta G, et al. Serum levels of interleukin-1 $\alpha$ , Interleukin-1 $\beta$ , Interleukin-6, And tumor necrosis factor in patients with acute viral hepatitis. *Clinical Infectious Diseases.* 1994; 18(2):194–8.
59. Spanakis NE, Garinis GA, Alexopoulos EC, Patrinos GP, Menounos PG, Sklavounou A, et al. Cytokine serum levels in patients with chronic HCV infection. *J Clin Lab Anal.* 2002; 16(1):40–6. <https://doi.org/10.1002/jcla.2060> PMID: 11835530
60. Borges ÁH, O'Connor JL, Phillips AN, Rønsholt FF, Pett S, Vjecha MJ, et al. Factors Associated with Plasma IL-6 Levels during HIV Infection. *Journal of Infectious Diseases.* 2015; 212(4):585–95. <https://doi.org/10.1093/infdis/jiv123> PMID: 25722296
61. Ergönül Ö, Şeref C, Eren Ş, Çelikbaş A, Baykam N, Dokuzoğuz B, et al. Cytokine response in Crimean-Congo hemorrhagic fever virus infection. *J Med Virol.* 2017; 89(10):1707–13. <https://doi.org/10.1002/jmv.24864> PMID: 28547808
62. Chirathaworn C, Poovorawan Y, Lertmaharit S, Wuttirattanakit N. Cytokine levels in patients with Chikungunya virus infection. *Asian Pac J Trop Med.* 2013; 6(8):631–4. [https://doi.org/10.1016/S1995-7645\(13\)60108-X](https://doi.org/10.1016/S1995-7645(13)60108-X) PMID: 23790334
63. Lucas C, Wong P, Klein J, Castro TBR, Silva J, Sundaram M, et al. Longitudinal analyses reveal immunological misfiring in severe COVID-19. *Nature.* 2020; 584(7821):463–9. <https://doi.org/10.1038/s41586-020-2588-y> PMID: 32717743
64. Chi Y, Ge Y, Wu B, Zhang W, Wu T, Wen T, et al. Serum cytokine and chemokine profile in relation to the severity of coronavirus disease 2019 in China. *Journal of Infectious Diseases.* 2020; 222(5):746–54. <https://doi.org/10.1093/infdis/jiaa363> PMID: 32563194
65. Laterre PF, François B, Collienne C, Hantson P, Jeannot R, Remy KE, et al. Association of Interleukin 7 Immunotherapy with Lymphocyte Counts among Patients with Severe Coronavirus Disease 2019 (COVID-19). *JAMA Netw Open.* 2020; 3(7):5–9. <https://doi.org/10.1001/jamanetworkopen.2020.16485> PMID: 32697322
66. Monneret G, de Marignan D, Coudereau R, Bernet C, Ader F, Frobert E, et al. Immune monitoring of interleukin-7 compassionate use in a critically ill COVID-19 patient. *Cell Mol Immunol.* 2020; 17(9):1001–3. <https://doi.org/10.1038/s41423-020-0516-6> PMID: 32728202
